# Supplementary material for: Neuregulin 2 Is a Candidate Gene for Autism Spectrum Disorder
Source: Preprints.org preprint supplement (doi:10.20944/preprints202403.1755.v1), 2024-03-28
Supplement: Supplementary file 1 [file supplementary]

## Sheet: sample list
DNA No.	IVS3+13 A>G	IVS9+32 T>A	IntelGCCCGGC
U-1304	AA	N/A	N/A
U-1316	failed	N/A	N/A
U-1344	failed	N/A	N/A
U-1368	AA	N/A	N/A
U-1385	AA	N/A	N/A
U-1388	AA	N/A	N/A
U-1391	AA	N/A	N/A
U-1411	failed	N/A	N/A
U-1446	failed	N/A	N/A
U-1456	failed	N/A	N/A
U-1465	AA	N/A	N/A
U-1487	N/A	N/A	N/A
U-1502	AA	N/A	N/A
U-1519	N/A	N/A	N/A
U-1559	N/A	N/A	N/A
U-1574	N/A	N/A	N/A
U-1595	GG	N/A	N/A
U-1617	AG	N/A	N/A
U-1652	AA	N/A	N/A
U-1723	N/A	N/A	N/A
U-1745	N/A	N/A	N/A
U-1756	GG	N/A	N/A
U-1792	AA	N/A	N/A
U-1822	AA	N/A	N/A
U-1836	AG	N/A	N/A
U-1847	AA	N/A	N/A
U-1870	AA	N/A	N/A
U-1911	AA	N/A	N/A
U-1971	AA	N/A	N/A
U-1978	AA	N/A	N/A
U-1999	AA	N/A	N/A
U-2004	AA	N/A	N/A
U-2078	AA	N/A	N/A
U-2082	AA	N/A	N/A
U-2190	AA	N/A	N/A
U-2227	AA	N/A	N/A
U-2243	AG	N/A	N/A
U-2261	AA	N/A	N/A
U-2263	AG	N/A	N/A
U-2270	AA	N/A	N/A
U-2300	AG	N/A	N/A
U-2308	AA	N/A	N/A
U-2353	N/A	TT	N/A
U-2631	AA	TT	N/A
U-2650	AA	TT	CC
U-3232	GG	TT	failed
U-3367	AA	TT	CC
U-3370	AA	TT	CC
U-3393	AG	TT	CC
U-3409	AA	TT	CC
U-3418	AA	TT	CC
U-3423	N/A	failed	CC
U-3424	AA	TT	failed
U-3435	AA	TT	CC
U-3438	AA	TT	CC
U-3444	AG	TT	failed
U-3451	AA	TT	CC
U-3459	N/A	TT	CC
U-3474	AA	TT	CC
U-3483	AA	TT	CC
U-3485	AA	TT	C/indelGCCCGGC
U-3491	AA	TT	C/indelGCCCGGC
U-3523	AA	TT	CC
U-3572	AA	TT	C/indelGCCCGGC
U-3582	AA	TT	CC
U-3586	AA	TT	CC
U-3589	AA	TT	CC
U-3592	AA	TT	CC
U-3611	AA	TT	CC
U-3618	AA	TT	C/indelGCCCGGC
U-3621	AA	TT	CC
U-3625	AA	TT	CC
U-3628	AA	TT	CC
U-3631	AG	TT	failed
U-3638	AA	TT	CC
U-3641	AA	TT	C/indelGCCCGGC
U-3644	AA	TT	CC
U-3647	AG	TT	CC
U-3657	AA	TT	CC
U-3659	AG	TT	failed
U-3666	AA	TT	CC
U-3673	AA	TT	CC
U-3676	AA	TT	CC
U-3701	AA	TT	C/indelGCCCGGC
U-3703	N/A	TT	failed
U-3712	AA	TT	CC
U-3716	AA	TT	failed
U-3720	AA	TT	CC
U-3725	AA	TT	C/indelGCCCGGC
U-3733	AG	TT	CC
U-3736	AA	TT	C/indelGCCCGGC
U-3740	AA	TT	CC
U-3745	AA	TT	CC
U-3748	AA	TT	CC
U-3751	AA	TT	CC
U-3756	AA	TT	CC
U-3760	AA	TT	CC
U-3764	AA	TT	CC
U-3767	AG	TT	CC
U-3771	AA	TT	CC
U-3773	AA	TT	CC
U-3779	AA	TT	CC
U-3782	AA	TT	CC
U-3790	N/A	TT	failed
U-3793	AA	TT	CC
U-3805	N/A	TT	failed
U-3833	failed	TT	failed
U-3849	AG	TT	CC
U-3855	AA	TT	CC
U-3860	AA	TT	CC
U-3865	AA	TT	CC
U-3869	AA	TT	CC
U-3871	AA	TT	CC
U-3875	AA	TT	CC
U-3882	AA	TT	CC
U-3884	AA	TT	CC
U-3887	AA	TT	CC
U-3892	AA	TT	CC
U-3895	AA	TT	CC
U-3899	AG	TT	CC
U-3909	AA	TT	CC
U-3917	failed	TT	failed
U-3926	AA	TT	CC
U-3930	AA	TT	CC
U-3934	AA	TT	CC
U-3941	AA	TT	CC
U-3949F	AA	TT	C/indelGCCCGGC
U-3953	AA	TT	CC
U-3965F	failed	TT	failed
U-3972	N/A	TT	failed
U-3975	AA	TT	CC
U-3979F	N/A	TT	failed
U-3982F	failed	TT	failed
U-3986	AA	TT	CC
U-3990F	AA	TT	CC
U-4005F	AA	TT	CC
U-4011F	AG	TT	CC
U-4015	AA	TT	CC
U-4019	AA	TT	C/indelGCCCGGC
U-4034F	N/A	failed	CC
U-4039F	AA	TT	CC
U-4052F	N/A	TT	failed
U-4054F	AG	TT	failed
U-4055	AA	TT	CC
U-4068F	failed	TT	failed
U-4075F	failed	TT	failed
U-4077	AA	TT	C/indelGCCCGGC
U-4081	AA	TT	CC
U-4084	AA	TT	C/indelGCCCGGC
U-4087	AA	TT	CC
U-4091	AA	TT	CC
U-4094	AA	TT	CC
U-4100	AA	TT	CC
U-4102F	AG	TT	CC
U-4104F	AA	TT	CC
U-4108F	failed	TT	failed
U-4113	AA	TT	CC
U-4114F	AG	TT	CC
U-4116F	AA	TT	CC
U-4117F	AA	TT	CC
U-4125F	AA	TT	CC
U-4127	AA	TT	CC
U-4132F	AG	TT	CC
U-4133F	AG	TT	CC
U-4136F	N/A	TT	failed
U-4140F	AA	TT	CC
U-4144F	AG	TT	CC
U-4148F	AA	TT	CC
U-4151F	AA	TT	CC
U-4154F	AA	TT	CC
U-4158F	N/A	TT	CC
U-4161F	AA	TT	CC
U-4162F	AA	TT	CC
U-4163	AA	TT	C/indelGCCCGGC
U-4166	AA	TT	CC
U-4171F	AA	TT	CC
U-4174F	AG	TT	C/indelGCCCGGC
U-4176F	AG	TT	CC
U-4179F	AA	TT	CC
U-4180F	AA	TT	CC
U-4183F	N/A	TT	CC
U-4188F	AA	TT	CC
U-4191F	AA	TT	CC
U-4195F	AA	TT	CC
U-4198F	AG	TT	CC
U-4202F	AA	TT	CC
U-4210F	failed	TT	failed
U-4214F	AA	TT	C/indelGCCCGGC
U-4218F	AA	TT	CC
U-4221F	AA	TT	CC
U-4225F	AA	TT	CC
U-4228	AA	TT	CC
U-4236F	AG	TT	CC
U-4239F	failed	TT	failed
U-4241	AA	TT	CC
U-4244F	failed	TT	failed
U-4249	AA	TT	CC
U-4251	AA	TT	CC
U-4253F	AA	TT	CC
U-4257F	AA	TT	CC
U-4261F	failed	TT	failed
U-4264	AA	TT	CC
U-4268F	AA	TT	C/indelGCCCGGC
U-4269F	AG	TT	failed
U-4271	AA	TT	C/indelGCCCGGC
U-4273F	AA	TT	CC
U-4276F	AA	TT	CC
U-4280	AA	TT	CC
U-4283F	N/A	TT	failed
U-4286F	N/A	TT	CC
U-4290	GG	TT	CC
U-4294F	AA	TT	CC
U-4296F	AA	TT	CC
U-4299F	AA	TT	CC
U-4304F	failed	TT	failed
U-4307F	AA	TT	CC
U-4311F	AA	TT	CC
U-4313	AG	TT	CC
U-4316	AA	TT	CC
U-4321	AA	TT	CC
U-4328	N/A	TT	CC
U-4329	AA	TT	CC
U-4331F	AA	TT	CC
U-4337F	AA	TT	CC
U-4338	N/A	TT	failed
U-4342F	AA	TT	CC
U-4347	AA	TT	CC
U-4349	N/A	TT	CC
U-4352	AA	TT	CC
U-4356F	AA	TT	CC
U-4359	AA	TT	CC
U-4363	failed	TT	failed
U-4368F	N/A	TT	CC
U-4371F	AA	TT	C/indelGCCCGGC
U-4372	N/A	TT	failed
U-4380F	N/A	TT	CC
U-4384	AA	TT	CC
U-4387	AA	TT	CC
U-4390F	AA	TT	CC
U-4392F	AA	TT	CC
U-4394	AA	TT	CC
U-4397	AA	TT	CC
U-4400	AA	TT	CC
U-4401	AA	TT	CC
U-4404	AG	TT	CC
U-4408F	AA	TT	CC
U-4413F	AA	TT	CC
U-4418F	AA	TT	CC
U-4422F	AA	TT	CC
U-4426	AA	TT	CC
U-4430	AG	TT	C/indelGCCCGGC
U-4434F	AA	TT	CC
U-4436F	failed	TT	CC
U-4437	failed	TT	failed
U-4442F	AA	TT	CC
U-4444	AA	TT	CC
U-4446F	AA	TT	CC
U-4454F	failed	TT	CC
U-4460	failed	TT	failed
U-4461	AA	TT	CC
U-4465F	AA	TT	CC
U-4468	AA	TT	C/indelGCCCGGC
U-4473	AA	TT	CC
U-4477F	AA	TT	CC
U-4481	AA	TT	C/indelGCCCGGC
U-4485	AA	TT	CC
U-4489	AA	TT	CC
U-4490	AA	TT	CC
U-4493	N/A	TT	CC
U-4495F	AA	TT	CC
U-4496F	AG	TT	CC
U-4502F	N/A	TT	C/indelGCCCGGC
U-4505F	N/A	TT	CC
U-4511F	AA	TT	CC
U-4512F	AA	TT	CC
U-4515F	AA	TT	CC
U-4519F	AA	TT	CC
U-4522F	AA	TT	CC
U-4525F	AA	TT	CC
U-4528F	AA	TT	CC
U-4530F	AA	TT	C/indelGCCCGGC
U-4531F	AA	TT	CC
U-4533F	AA	TT	CC
U-4535F	N/A	TT	CC
U-4537F	N/A	TT	C/indelGCCCGGC
U-4539F	N/A	TT	C/indelGCCCGGC
U-4542F	N/A	TT	CC
U-4546F	N/A	TT	CC
U-4549F	N/A	TT	CC
U-4551F	N/A	TT	CC
U-4553F	N/A	TT	CC
U-4555F	N/A	TT	CC
U-4557F	N/A	TT	CC
U-4559	N/A	TT	failed
U-4562F	N/A	TT	CC
U-4564F	N/A	TT	CC
U-4567F	N/A	TT	CC
U-4569F	N/A	TT	CC
U-4572F	N/A	TT	CC
U-4574F	N/A	TT	CC
U-4577F	N/A	TT	CC
U-4579F	N/A	TT	CC
U-4581F	N/A	TT	CC
U-4585F	N/A	TT	CC
U-4589F	N/A	TT	CC
U-4592F	N/A	TT	CC
U-4595F	N/A	TT	C/indelGCCCGGC
U-4597F	N/A	TT	CC
U-4599F	N/A	TT	CC
U-4601F	N/A	TT	CC
U-4604F	N/A	TT	CC
U-4608F	N/A	TT	CC
U-4610F	N/A	TT	CC
U-4612F	N/A	TT	CC
U-4614F	N/A	TT	C/indelGCCCGGC
U-4617F	N/A	TT	C/indelGCCCGGC
U-4620F	N/A	TT	CC
U-4622F	N/A	TT	CC
U-4624F	N/A	TT	CC
U-4626F	N/A	TT	CC
U-4628F	N/A	TA	CC
U-4631F	N/A	TT	C/indelGCCCGGC
U-4633F	N/A	TT	CC
U-4635F	N/A	TT	C/indelGCCCGGC
U-4637F	N/A		failed
U-4639F	N/A	TT	CC
U-4641	N/A	TT	failed
U-4643F	N/A	TT	CC
U-4647F	N/A	TT	CC
U-4649F	N/A	TT	C/indelGCCCGGC
U-4651F	N/A	TT	CC
U-4653F	N/A	TT	CC
U-4655F	N/A	TT	CC
U-4661F	N/A	TT	CC
U-4664F	N/A	TT	CC
U-4666F	N/A	TT	CC
U-4667F	N/A	TT	CC
U-4670F	N/A	TT	CC
U-4672F	N/A	TT	CC
U-4773	N/A	TT	CC
U-4796F	N/A	TT	CC
U-4809	N/A	TT	CC
U-4810	N/A	N/A	N/A
U-4811	N/A	N/A	N/A
U-4812	N/A	N/A	N/A
U-4813	N/A	N/A	N/A
U-4814F	N/A	TT	CC
U-4816F	N/A	N/A	N/A
U-4817	N/A	TT	CC
